# Supplementary material for: The Endophytic Fungi Diversity, Community Structure, and Ecological Function Prediction of Sophora alopecuroides in Ningxia, China
Source: MDPI journal article supplement (doi:10.3390/microorganisms10112099), 2022-10-22
Supplement: s1 [file s1]

# Supplementary materials

Supplementary Table.S1 The Alpha-Diversity indexes of each tissue type and two sites of *S. alopecuroides* endophytic fungi at the genus level (mean  $\pm$  SD).

| Sample | sequence | Ace               | Simpson            | Shannoneven     | PD              |
|--------|----------|-------------------|--------------------|-----------------|-----------------|
| H      | HR       | 50437 $\pm$ 3080  | 114.47 $\pm$ 51.46 | 0.27 $\pm$ 0.19 | 0.45 $\pm$ 0.13 |
|        | HSt      | 51361 $\pm$ 6789  | 89.23 $\pm$ 31.91  | 0.32 $\pm$ 0.35 | 0.45 $\pm$ 0.23 |
|        | HL       | 79608 $\pm$ 46329 | 94.03 $\pm$ 18.67  | 0.36 $\pm$ 0.40 | 0.42 $\pm$ 0.25 |
|        | HS       | 51149 $\pm$ 21880 | 64.48 $\pm$ 5.02   | 0.29 $\pm$ 0.04 | 0.43 $\pm$ 0.02 |
|        | mean     | 58139 $\pm$ 25596 | 90.55 $\pm$ 32.86  | 0.31 $\pm$ 0.24 | 0.44 $\pm$ 0.16 |
| B      | BR       | 55586 $\pm$ 3137  | 98.01 $\pm$ 10.54  | 0.18 $\pm$ 0.07 | 0.53 $\pm$ 0.09 |
|        | BSt      | 56303 $\pm$ 9111  | 53.4 $\pm$ 2.93    | 0.20 $\pm$ 0.04 | 0.57 $\pm$ 0.06 |
|        | BL       | 55921 $\pm$ 13903 | 52.37 $\pm$ 20.78  | 0.39 $\pm$ 0.12 | 0.43 $\pm$ 0.07 |
|        | BS       | 45273 $\pm$ 8671  | 53.22 $\pm$ 11.61  | 0.30 $\pm$ 0.10 | 0.44 $\pm$ 0.10 |
|        | mean     | 53271 $\pm$ 9435  | 64.25 $\pm$ 23.22  | 0.27 $\pm$ 0.11 | 0.49 $\pm$ 0.09 |

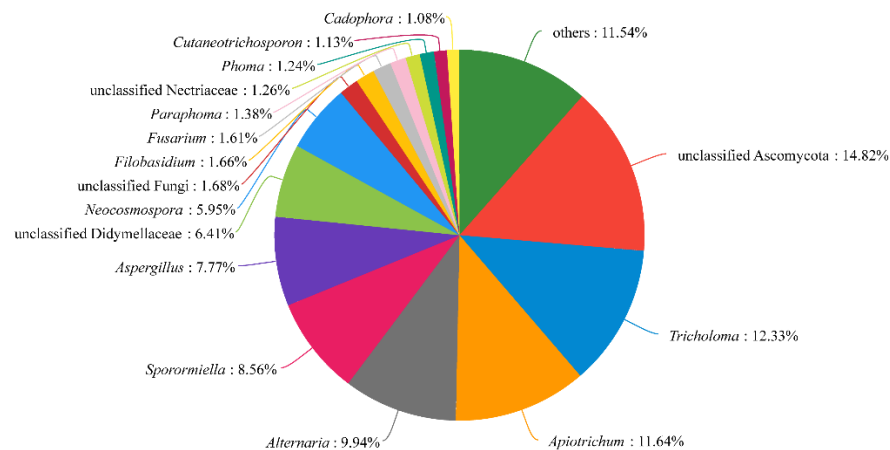

Supplementary Figure.S1 Overall community composition of *S. alopecuroides* endophytic fungi at the genus level.
